# Supplementary material for: H4K5 Butyrylation Coexist with Acetylation during Human Spermiogenesis and Are Retained in the Mature Sperm Chromatin
Source: Int J Mol Sci. 2022 Oct 17;23(20):12398. doi: 10.3390/ijms232012398 (PMC9604518; doi:10.3390/ijms232012398)
Supplement: Supplementary file 1 [file ijms-23-12398-s001.zip › Table S1 v20220930_revised.xlsx]

## Sheet: Table S1
Table S1. Individual H4K5ac H-Scores in testicular sections from patients with normal spermatogenesis and testicular cancer. Results are expressed according to the testicular cell type analyzed. H-score is expressed per patient, and summarized at the bottom of the table as mean ± SD. The number of evaluated tubular sections presenting each of the analyzed cell types is indicated in brackets. Data…
Group	Patient ID	SC	SPG	SPC	rSPD (I-V)	rSPD (VI-VIII)	eSPD	cSPD	Karyotype	AZF status	CFTR status
Normal spermatogenesis	Controls (N)
	N1	95.7 (23)	284.0 (25)	33.3 (24)	323.5 (17)	462.5 (8)	553.8 (13)	0.0 (14)	45,X/46,XY (4%)	Normal	c. [1210-12[5];1210-34TG[12]]; c.2619+3A>G; p.Asp443Tyr; p.Gly576Ala; p.Arg668Cys
	N2	152.6 (19)	253.8 (26)	53.6 (28)	344.4 (9)	500.0 (7)	559.1 (22)	0.0 (11)	46,XY	Normal	Normal
	N3	104.3 (23)	292.0 (25)	72.4 (29)	321.4 (14)	477.8 (9)	415.8 (19)	0.0 (20)	46,XY	Normal	p.Arg117His carrier
	N5	38.9 (18)	165.5 (29)	20.7 (29)	161.5 (13)	420.0 (5)	505.9 (17)	5.3 (19)	46,XY	Normal	Normal
	N6	181.8 (22)	300.0 (29)	86.7 (30)	270.0 (20)	320.0 (10)	500.0 (10)	0.0 (13)	46,XY	-	-
	N7	33.3 (12)	176.2 (21)	13.8 (29)	275.0 (8)	314.3 (7)	434.8 (23)	0.0 (13)	46,XY	Normal	Normal
	Internal Control	200 (29)	224.1 (29)	46.7 (30)	228.6 (14)	425.0 (4)	466.7 (15)	0.0 (14)	-	-	-
	Mean ± SD	101.1 ± 59.5	245.3 ± 59.8	46.8 ± 29.1	282.7 ± 66.2	415.8 ± 80.8	494.9 ± 59.4	0.9 ± 2.1
Testicular cancer	Seminoma (SEM)
	SEM1	304.3 (23)	300.0 (30)	232.0 (25)	341.7 (12)	511.1 (9)	473.3 (15)	16.7 (6)	-	-	-
	SEM2	133.3 (18)	164.0 (25)	100.0 (26)	347.1 (17)	425 (4)	510.0 (10)	0.0 (11)	-	-	-
	SEM3	208.3 (24)	179.3 (29)	20.7 (29)	194.1 (17)	200.0 (2)	333.3 (12)	6.3 (16)	-	-	-
	SEM4	268.2 (22)	393.3 (30)	244.8 (29)	400.0 (17)	450.0 (6)	576.9 (13)	0.0 (21)	-	-	-
	Mean ± SD	228.5 ± 74.8 *	259.2 ± 108.2	149.4 ± 107.9	320.7 ± 88.4	396.5 ± 135.9	473.4 ± 102.8	5.7 ± 7.86
	Teratoma (TER)
	TER1	240.0 (25)	263.0 (27)	96.2 (26)	300.0 (14)	366.7 (6)	420.0 (15)	0.0 (9)	-	-	-
	TER2	317.4 (23)	343.3 (30)	193.1 (29)	400.0 (19)	550.0 (2)	572.7 (11)	0.0 (8)	-	-	-
	TER3	290.0 (20)	306.7 (30)	207.1 (28)	328.6 (14)	425 (4)	546.7 (15)	0.0 (11)	-	-	-
	Mean ± SD	282.5 ± 39.2 *	304.3 ± 40.2	165.5 ± 60.4 *	342.9 ± 51.5	447.2 ± 93.7	513.1 ± 81.7	0.0 ± 0.0
* p < 0.05 after comparison of H4K5ac H-Scores of infertile patients with altered spermatogenesis and testicular cancer patients with the control group. Student's t-test was applied in all cell types except SPC and cSPD, in which Mann-Withney U test was performed. cSPD, condensed spermatids; eSPD, elongating spermatids; rSPD I-V, early-stages (I-V) round spermatids; rSPD VI–VIII, late-stages (VI–…
