# Supplementary material for: H4K5 Butyrylation Coexist with Acetylation during Human Spermiogenesis and Are Retained in the Mature Sperm Chromatin
Source: Int J Mol Sci. 2022 Oct 17;23(20):12398. doi: 10.3390/ijms232012398 (PMC9604518; doi:10.3390/ijms232012398)
Supplement: Supplementary file 1 [file ijms-23-12398-s001.zip › Table S2 v20220930_revised.xlsx]

## Sheet: Table S2
Table S2. H4K5bu H-Scores in testicular sections per individual patient. Immunohistochemical results of H4K5bu in testicular sections from control patients (Normal spermatogenesis), patients with altered spermatogenesis (Sertoli cell-only syndrome, hypospermatogenesis, and spermatogenic arrest) and patients with testicular cancer (seminoma and teratoma). Results are expressed according to the tes…
Group	Patient ID	SC	SPG	SPC	rSPD (I-V)	rSPD (VI-VIII)	eSPD	cSPD	Karyotype	AZF status	CFTR status
Normal spermatogenesis	Controls (N)
	N1	0.0 (29)	48.3 (29)	0.0 (26)	22.2 (9)	300.0 (7)	504.8 (21)	0.0 (17)	46,XY	Normal	c.[1210-12[5];1210-34TG[12]]; c.2619+3A>G; p.Asp443Tyr; p.Gly576Ala; p.Arg668Cys
	N2	0.0 (24)	4.0 (25)	0.0 (28)	112.5 (8)	390.9 (11)	473.9 (23)	0.0 (17)	46,XY	Normal	Normal
	N3	0.0 (20)	59.3 (27)	0.0 (29)	0.0 (9)	288.9 (7)	513.3 (15)	0.0 (16)	46,XY	Normal	p.Arg117His carrier
	N4	14.8 (27)	83.3 (24)	0.0 (30)	NA	521.4 (14)	451.9 (27)	0.0 (11)	-	-	-
	N5	0.0 (17)	0.0 (28)	0.0 (30)	0.0 (16)	275.0 (4)	514.3 (14)	0.0 (11)	46,XY	Normal	Normal
	N6	0.0 (16)	3.3 (30)	0.0 (30)	19.0 (21)	138.5 (13)	412.5 (8)	5.3 (19)	46,XY	-	-
	Internal Control	0.0 (48)	0.0 (49)	0.0 (46)	22.2 (27)	210.0 (10)	368.4 (19)	6.7 (15)	-	-	-
	Mean ± SD	2.5 ± 6.1	33 ± 35.4	0.0 ± 0.0	30.8 ± 46.9	319.1 ± 128.0	478.4 ± 40.7	0.9 ± 2.1
Altered Spermatogenesis	Sertoli-Cell Only (SCO)
	SCO1	0.0 (30)	NA	NA	NA	NA	NA	NA	46,XY	Complete AZFc deletion	Normal
	SCO2	26.7 (30)	NA	NA	NA	NA	NA	NA	46,XY	Normal	Normal
	SCO3	0.0 (30)	NA	NA	NA	NA	NA	NA	46,XY	Normal	-
	Mean ± SD	8.9 ± 15.4	NA	NA	NA	NA	NA	NA
	Hipospermatogenesis (HP)
	HP1	0.0 (27)	82.6 (23)	0.0 (25)	20.0 (5)	442.9 (7)	533.3 (18)	0.0 (5)	46,XY[56]/46,XY,ins(18;7)(q21;p15p13)[8] (equilibrated)	-	Normal
	HP2	0.0 (17)	0.0 (18)	0.0 (18)	0.0 (6)	275.0 (4)	377.8 (9)	0.0 (5)	46,XY	-	-
	Mean ± SD	0.0 ± 0.0	41.3 ± 58.4	0.0 ± 0.0	10.0 ± 14.14	358.9 ± 118.7	455.6 ± 110.0	0.0 ± 0.0
	Spermatogenic Arrest (SA)
	SA1 (partial rSPD arrest)	0.0 (24)	27.6 (29)	6.7 (30)	192.3 (13)	180.0 (5)	460.0 (10)	225.0 (4)	46,XY	Normal	Normal
	SA2 (partial SPC arrest)	0.0 (30)	3.6 (28)	0.0 (13)	NA	600.0 (2)	450.0 (10)	NA	46,XY	Normal	Normal
	SA3 (total SPC arrest)	0.0 (29)	20.0 (30)	0.0 (27)	NA	NA	NA	NA	46,XY	Normal	Normal
	Mean ± SD	0.0 ± 0.0	12.8 ± 13.2	1.7 ± 3.3	192.3	460.0 ± 242.5	439.4 ± 27.4	225
Testicular cancer	Seminoma (SEM)
	SEM1	0.0 (25)	95.7 (23)	0.0 (29)	0.0 (1)	200.0 (8)	265.4 (26)	0.0 (6)	-	-	-
	SEM2	0.0 (25)	3.4 (29)	0.0 (23)	0.0 (10)	244.4 (9)	429.4 (17)	0.0 (8)	-	-	-
	SEM3	0.0 (30)	20.0 (30)	0.0 (28)	0.0 (14)	NA	312.5 (16)	0.0 (5)	-	-	-
	SEM4	0.0 (20)	85.7 (28)	0.0 (27)	0.0 (8)	212.5 (8)	313.0 (23)	0.0 (9)	-	-	-
	Mean ± SD	0.0 ± 0.0	51.2 ± 46.3	0.0 ± 0.0	0.0 ± 0.0	219.0 ± 22.9	330.1 ± 69.9 *	0.0 ± 0.0
	Teratoma (TER)
	TER1	0.0 (24)	119.2 (26)	0.0 (6)	47.1 (17)	333.3 (3)	578.6 (14)	0.0 (12)	-	-	-
	TER2	45.5 (22)	206.9 (29)	0.0 (24)	161.5 (13)	550.0 (6)	381.3 (16)	0.0 (5)	-	-	-
	TER3	10.7 (28)	81.5 (27)	0.0 (30)	110.0 (10)	350.0 (4)	481.0 (21)	0.0 (8)	-	-	-
	Mean ± SD	18.7 ± 23.8	135.9 ± 64.3 *	0.0 ± 0.0	106.2 ± 57.3	411.1 ± 120.6	480.2 ± 98.7	0.0 ± 0.0
* p < 0.05, after comparison of H4K5bu H-Scores of infertile patients with altered spermatogenesis and testicular cancer patients with the control group. Student's t-test was applied in rSPD (VI-VIII) and eSPD, whereas Mann-Withney U test was performed in the rest of cell types. Note that HP was not considered for statistical analysis due to the limited sample availability. The same applies to SA…
